# Supplementary material for: Is anti-HMGB1 Antibody a Potential Characteristic Autoantibody for Sjögren's Syndrome?
Source: Research Square preprint supplement (doi:10.21203/rs.3.rs-105952/v1), 2020-11-18
Supplement: Supplementary file 1 [file 179dfff6f1a39d53399ecd08.docx]

Supplementary methods:

Construction of HMGB1 knockout cell line (B16HMGB1- ) in mouse melanoma cell lines B16

Guide RNA, proper targets, and primers were designed with the software provide by Feng Zhang’s Lab (<http://crispr.mit.edu/>). Plasmid pX330 (Addgene) with the gRNA (pX330-HMGB1) were transfected into B16 cells. Puromycin was used to select the cells transfected with the plasmids, and serial dilutions was used to isolate the clonal cell line. The successful construction of HMGB1 knockout cell line (B16HMGB1- ) was confirmed by sequence of the PCR products targeting the ATG gene area of HMGB1 and Western blotting.

SupplTable 1: The gRNAs and primers used to generate HMGB1 knockout B16 cells

| **gRNA and primers** | **Sequences** |
| --- | --- |
| gRNA-1F | CACCGGGAGATCCTAAAAAGCCGAG |
| gRNA-1R | AAACCTCGGCTTTTTAGGATCTCCC |
| gRNA-2F | CACCGATTTTGCCTCTCGGCTTTTT |
| gRNA-2R | AAACAAAAAGCCGAGAGGCAAAATC |
| HMGB1-F | ACCGCTTCTAGGAATTGGCT |
| HMGB1-R | GTGCATTGGGGTCCTTGAAC |

Supplementary figure legends

SupplFig. 1. Detection of anti-HMGB1 antibodies in SS with immunoblotting

Indirect immunoblotting was also used to confirm the detection of anti-HMGB1 antibodies in SS.

SupplFig. 2. The construction of B16HMGB1- was confirmed with Western blotting and sequence

a) Western blotting results showed that no HMGB1 protein was detected in B16HMGB1- cells. b) Sequence of the PCR products showed Insertion and deletion mutations in B16HMGB1- cells.
